# Supplementary material for: Seven Conformations of the Macrocycle Cyclododecanone Unveiled by Microwave Spectroscopy
Source: MDPI journal article supplement (doi:10.3390/molecules26175162), 2021-08-26
Supplement: s1 [file s1]

# **Seven conformations of the macrocycle cyclododecanone unveiled by microwave spectroscopy**

Ecaterina Burevschi, M. Eugenia Sanz\*

Department of Chemistry  
King's College London  
London SE1 1DB, United Kingdom

## **Supplementary Information**

## Table of Contents

**Table S1.** *Ab initio* spectroscopic parameters for the conformers of cyclododecanone within 1000 cm<sup>-1</sup>.

**Table S2.** Measured frequencies and residuals (in MHz) for the rotational transitions of the parent species of conformer I.

**Table S3.** Measured frequencies and residuals (in MHz) for the rotational transitions of the <sup>13</sup>C<sub>1</sub> isotopologue of conformer I.

**Table S4.** Measured frequencies and residuals (in MHz) for the rotational transitions of the <sup>13</sup>C<sub>2</sub> isotopologue of conformer I.

**Table S5.** Measured frequencies and residuals (in MHz) for the rotational transitions of the <sup>13</sup>C<sub>3</sub> isotopologue of conformer I.

**Table S6.** Measured frequencies and residuals (in MHz) for the rotational transitions of the <sup>13</sup>C<sub>4</sub> isotopologue of conformer I.

**Table S7.** Measured frequencies and residuals (in MHz) for the rotational transitions of the <sup>13</sup>C<sub>5</sub> isotopologue of conformer I.

**Table S8.** Measured frequencies and residuals (in MHz) for the rotational transitions of the <sup>13</sup>C<sub>6</sub> isotopologue of conformer I.

**Table S9.** Measured frequencies and residuals (in MHz) for the rotational transitions of the <sup>13</sup>C<sub>7</sub> isotopologue of conformer I.

**Table S10.** Measured frequencies and residuals (in MHz) for the rotational transitions of the <sup>13</sup>C<sub>8</sub> isotopologue of conformer I.

**Table S11.** Measured frequencies and residuals (in MHz) for the rotational transitions of the <sup>13</sup>C<sub>9</sub> isotopologue of conformer I.

**Table S12.** Measured frequencies and residuals (in MHz) for the rotational transitions of the <sup>13</sup>C<sub>10</sub> isotopologue of conformer I.

**Table S13.** Measured frequencies and residuals (in MHz) for the rotational transitions of the <sup>13</sup>C<sub>11</sub> isotopologue of conformer I.

**Table S14.** Measured frequencies and residuals (in MHz) for the rotational transitions of the <sup>13</sup>C<sub>12</sub> isotopologue of conformer I.

**Table S15.** Measured frequencies and residuals (in MHz) for the rotational transitions of conformer II.

**Table S16.** Measured frequencies and residuals (in MHz) for the rotational transitions of the parent species of conformer III.

**Table S17.** Measured frequencies and residuals (in MHz) for the rotational transitions of conformer IV.

**Table S18.** Measured frequencies and residuals (in MHz) for the rotational transitions of conformer V.

**Table S19.** Measured frequencies and residuals (in MHz) for the rotational transitions of conformer VI.

**Table S20.** Measured frequencies and residuals (in MHz) for the rotational transitions of conformer VII.

**Table S21.** Benchmarking of the theoretical rotational constants against the experimental ( $A_{\text{calc}} - A_{\text{exp}})/A_{\text{exp}} \times 100\%$ .

**Table S22.** Experimental spectroscopic parameters for all singly substituted <sup>13</sup>C isotopic species of conformer I of cyclododecanone.

**Table S23.** Substitution coordinates of the heavy atoms of conformer I of cyclododecanone in Å.

**Table S24.** The Cartesian coordinates of the conformer **I** of cyclododecanone from B3LYP-D3BJ/3-611++G(d,p).

**Table S25.** The Cartesian coordinates of the conformer **II** of cyclododecanone from B3LYP-D3BJ/3-611++G(d,p).

**Table S26.** The Cartesian coordinates of the conformer **III** of cyclododecanone from B3LYP-D3BJ/3-611++G(d,p).

**Table S27.** The Cartesian coordinates of the conformer **IV** of cyclododecanone from B3LYP-D3BJ/3-611++G(d,p).

**Table S28.** The Cartesian coordinates of the conformer **V** of cyclododecanone from B3LYP-D3BJ/3-611++G(d,p).

**Table S29.** The Cartesian coordinates of the conformer **VI** of cyclododecanone from B3LYP-D3BJ/3-611++G(d,p).

**Table S30.** The Cartesian coordinates of the conformer **VII** of cyclododecanone from B3LYP-D3BJ/3-611++G(d,p).

**Table S1.** *Ab initio*<sup>a</sup> spectroscopic parameters for the conformers of cyclododecanone within 1000 cm<sup>-1</sup>.

|                                    | Conformer I |            | Conformer II |              | Conformer III |              | Conformer IV |              |
|------------------------------------|-------------|------------|--------------|--------------|---------------|--------------|--------------|--------------|
|                                    | B3LYP       | MP2        | B3LYP        | MP2          | B3LYP         | MP2          | B3LYP        | MP2          |
| $A^b$ (MHz)                        | 872.3       | 888.5      | 896.1        | 918.6        | 967.3         | 979.6        | 858.0        | 880.7        |
| $B$ (MHz)                          | 691.1       | 693.2      | 693.2        | 697.0        | 632.2         | 641.2        | 740.9        | 741.3        |
| $C$ (MHz)                          | 447.0       | 453.0      | 450.7        | 459.1        | 450.4         | 459.4        | 461.2        | 468.1        |
| $\mu_a$ (D)                        | 0.9         | 0.8        | 0.8          | 0.6          | 0.9           | 0.7          | -0.2         | -0.2         |
| $\mu_b$ (D)                        | 0.2         | 0.2        | 0.2          | 0.4          | -0.6          | -0.5         | 0.5          | 0.5          |
| $\mu_c$ (D)                        | -2.6        | -2.4       | -2.3         | -2.2         | 2.6           | 2.4          | 2.4          | 2.2          |
| $\Delta E^c$ (cm <sup>-1</sup> )   | 0.0         | 0.0        | 469.1        | 516.4        | 461.6         | 401.9        | 583.8        | 574.0        |
| $\Delta E_o^d$ (cm <sup>-1</sup> ) | <b>0.0</b>  | <b>0.0</b> | <b>446.4</b> | <b>527.8</b> | <b>455.8</b>  | <b>443.3</b> | <b>575.0</b> | <b>585.1</b> |
| $\Delta G^e$ (cm <sup>-1</sup> )   | 0.0         | 0.0        | 269.7        | 566.5        | 537.7         | 579.2        | 521.7        | 649.4        |

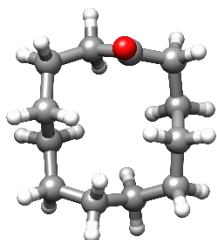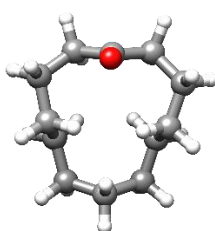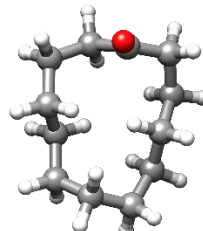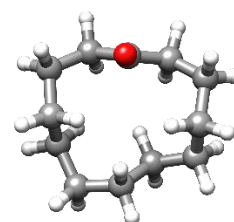

|                                    | Conformer V  |              | Conformer VI |              | Conformer VII |              | Conformer VIII |              |
|------------------------------------|--------------|--------------|--------------|--------------|---------------|--------------|----------------|--------------|
|                                    | B3LYP        | MP2          | B3LYP        | MP2          | B3LYP         | MP2          | B3LYP          | MP2          |
| $A^b$ (MHz)                        | 988.5        | 1002.0       | 914.3        | 925.0        | 943.7         | 951.8        | 890.5          | 915.4        |
| $B$ (MHz)                          | 630.1        | 635.2        | 673.7        | 680.3        | 682.2         | 687.6        | 678.6          | 675.0        |
| $C$ (MHz)                          | 445.6        | 451.7        | 442.3        | 447.9        | 453.3         | 458.3        | 451.7          | 455.8        |
| $\mu_a$ (D)                        | 1.3          | 1.1          | 0.3          | 0.2          | -0.1          | -0.1         | 0.5            | 0.6          |
| $\mu_b$ (D)                        | 0.4          | 0.4          | -0.3         | -0.3         | -0.3          | -0.2         | -1.1           | -1.0         |
| $\mu_c$ (D)                        | -2.5         | -2.3         | -2.4         | -2.2         | 2.4           | 2.2          | 2.6            | 2.4          |
| $\Delta E^c$ (cm <sup>-1</sup> )   | 495.3        | 452.6        | 645.6        | 604.9        | 698.0         | 726.3        | 823.8          | 962.2        |
| $\Delta E_o^d$ (cm <sup>-1</sup> ) | <b>590.6</b> | <b>508.3</b> | <b>592.1</b> | <b>572.0</b> | <b>611.2</b>  | <b>673.8</b> | <b>780.7</b>   | <b>956.5</b> |
| $\Delta G^e$ (cm <sup>-1</sup> )   | 780.9        | 663.3        | 583.4        | 538.2        | 594.6         | 696.4        | 595.2          | 875.0        |

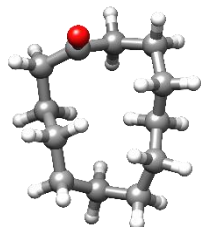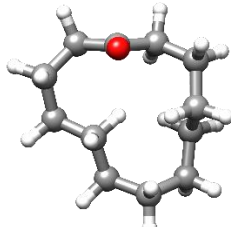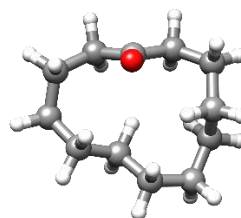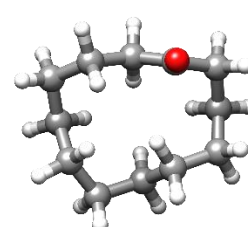

|                                    | Conformer IX |               | Conformer X  |              | Conformer XI (HP) |              | Conformer XII |               |
|------------------------------------|--------------|---------------|--------------|--------------|-------------------|--------------|---------------|---------------|
|                                    | B3LYP        | MP2           | B3LYP        | MP2          | B3LYP             | MP2          | B3LYP         | MP2           |
| $A^b$ (MHz)                        | 944.1        | 956.8         | 849.8        | 855.0        | 910.0             | 924.9        | 887.4         | 898.3         |
| $B$ (MHz)                          | 699.1        | 699.7         | 746.4        | 753.1        | 694.6             | 699.7        | 700.6         | 706.9         |
| $C$ (MHz)                          | 477.3        | 483.3         | 480.6        | 487.0        | 468.6             | 475.5        | 462.9         | 470.0         |
| $\mu_a$ (D)                        | 0.2          | 0.3           | -0.1         | -0.1         | -0.6              | -0.6         | 0.3           | 0.3           |
| $\mu_b$ (D)                        | -1.1         | -0.9          | 0.7          | 0.7          | 0.2               | 0.2          | 0.2           | 0.2           |
| $\mu_c$ (D)                        | -2.1         | -2.0          | -2.5         | -2.3         | 2.6               | 2.4          | -2.6          | -2.4          |
| $\Delta E^c$ (cm <sup>-1</sup> )   | 851.1        | 1031.2        | 824.8        | 918.9        | 845.7             | 848.8        | 860.3         | 986.5         |
| $\Delta E_o^d$ (cm <sup>-1</sup> ) | <b>802.8</b> | <b>1005.2</b> | <b>816.2</b> | <b>960.4</b> | <b>843.0</b>      | <b>879.9</b> | <b>858.4</b>  | <b>1030.2</b> |
| $\Delta G^e$ (cm <sup>-1</sup> )   | 802.8        | 1123.9        | 843.4        | 1003.0       | 848.0             | 885.8        | 894.6         | 1126.1        |

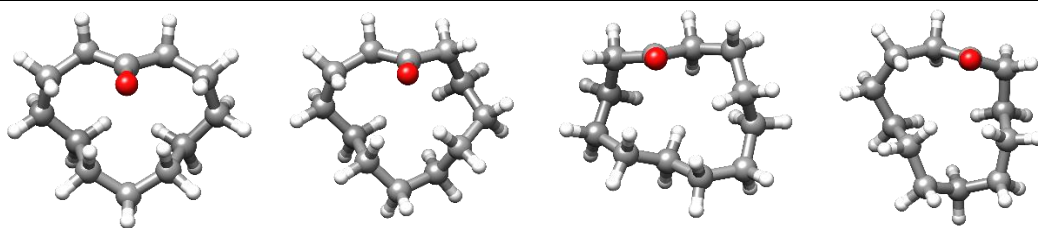

|                              | Conformer XIII |               | Conformer XIV |              | Conformer XV |              | Conformer XVI |              |
|------------------------------|----------------|---------------|---------------|--------------|--------------|--------------|---------------|--------------|
|                              | B3LYP          | MP2           | B3LYP         | MP2          | B3LYP        | MP2          | B3LYP         | MP2          |
| $A^b$ (MHz)                  | 945.6          | 946.6         | 898.8         | 908.9        | 914.8        | 920.7        | 881.9         | 889.6        |
| $B$ (MHz)                    | 687.7          | 696.6         | 661.4         | 665.8        | 663.7        | 674.4        | 686.0         | 694.1        |
| $C$ (MHz)                    | 459.7          | 465.3         | 437.4         | 442.1        | 442.6        | 449.5        | 460.5         | 466.3        |
| $\mu_a$ (D)                  | -0.5           | -0.5          | 0.5           | 0.5          | -0.6         | -0.4         | 0.8           | 0.6          |
| $\mu_b$ (D)                  | 0.5            | 0.4           | -0.9          | -0.7         | 0.3          | 0.3          | 0.8           | 0.8          |
| $\mu_c$ (D)                  | -2.3           | -2.1          | 2.5           | 2.3          | 2.6          | 2.4          | 2.4           | 2.3          |
| $\Delta E^c$ (cm $^{-1}$ )   | 897.4          | 1041.0        | 916.8         | 1011.4       | 870.4        | 752.2        | 958.1         | 978.3        |
| $\Delta E_o^d$ (cm $^{-1}$ ) | <b>867.1</b>   | <b>1003.7</b> | <b>893.0</b>  | <b>976.2</b> | <b>898.7</b> | <b>757.2</b> | <b>921.8</b>  | <b>944.4</b> |
| $\Delta G^e$ (cm $^{-1}$ )   | 932.5          | 1020.8        | 796.7         | 788.6        | 1031.5       | 860.1        | 870.7         | 878.1        |

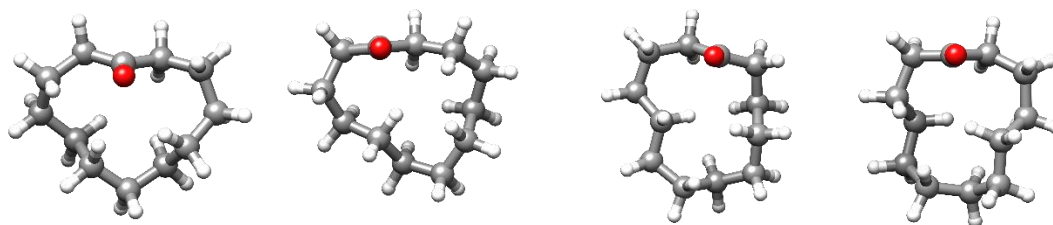

|                              | Conformer XVII |               | Conformer XVIII |              |
|------------------------------|----------------|---------------|-----------------|--------------|
|                              | B3LYP          | MP2           | B3LYP           | MP2          |
| $A^b$ (MHz)                  | 862.1          | 878.8         | 948.9           | 959.4        |
| $B$ (MHz)                    | 687.6          | 693.5         | 636.2           | 643.4        |
| $C$ (MHz)                    | 442.6          | 452.4         | 451.9           | 458.5        |
| $\mu_a$ (D)                  | -0.7           | -0.4          | 0.8             | 0.7          |
| $\mu_b$ (D)                  | -1.6           | -1.4          | -0.9            | -0.8         |
| $\mu_c$ (D)                  | 2.4            | 2.3           | 2.7             | 2.5          |
| $\Delta E^c$ (cm $^{-1}$ )   | 981.3          | 1099.9        | 919.0           | 824.0        |
| $\Delta E_o^d$ (cm $^{-1}$ ) | <b>958.4</b>   | <b>1094.1</b> | <b>1008.0</b>   | <b>922.5</b> |
| $\Delta G^e$ (cm $^{-1}$ )   | 870.7          | 960.6         | 1108.8          | 1021.7       |

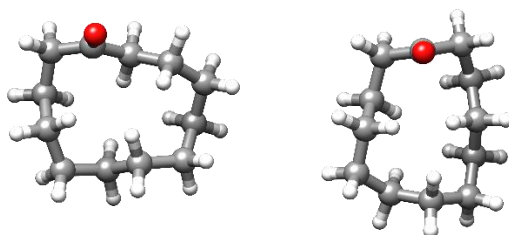

[a] B3LYP-D3BJ and MP2 with 6-311++G(d,p) basis set. [b]  $A$ ,  $B$ ,  $C$  are the rotational constants;  $\mu_a$ ,  $\mu_b$  and  $\mu_c$  are the electric dipole moment components. [c] Relative electronic energies. [d] Relative electronic energies including the zero-point correction. [e] Gibbs free energies at 417 K.

**Table S2.** Measured frequencies and residuals (in MHz) for the rotational transitions of the parent species of conformer I.

| J' | K' <sub>-1</sub> | K' <sub>+1</sub> | J'' | K'' <sub>-1</sub> | K'' <sub>+1</sub> | V <sub>obs</sub> | V <sub>obs</sub> -V <sub>calc</sub> |
|----|------------------|------------------|-----|-------------------|-------------------|------------------|-------------------------------------|
| 2  | 1                | 2                | 1   | 1                 | 1                 | 2047.9862        | -0.0014                             |
| 2  | 0                | 2                | 1   | 0                 | 1                 | 2154.4526        | -0.0069                             |
| 2  | 1                | 1                | 1   | 1                 | 0                 | 2550.6065        | 0.0067                              |
| 2  | 1                | 1                | 1   | 0                 | 1                 | 2967.0800        | -0.0027                             |
| 3  | 0                | 3                | 2   | 1                 | 2                 | 2982.8671        | 0.0044                              |
| 3  | 1                | 3                | 2   | 1                 | 2                 | 2996.9284        | -0.0007                             |
| 3  | 0                | 3                | 2   | 0                 | 2                 | 3041.5672        | 0.0003                              |
| 3  | 1                | 3                | 2   | 0                 | 2                 | 3055.6345        | 0.0013                              |
| 2  | 2                | 0                | 1   | 1                 | 0                 | 3190.9575        | -0.0041                             |
| 2  | 2                | 1                | 1   | 1                 | 1                 | 3297.4298        | -0.0050                             |
| 3  | 1                | 2                | 2   | 1                 | 1                 | 3687.4884        | 0.0000                              |
| 3  | 2                | 1                | 2   | 2                 | 0                 | 3856.3025        | -0.0048                             |
| 4  | 0                | 4                | 3   | 1                 | 3                 | 3909.3566        | -0.0036                             |
| 4  | 1                | 4                | 3   | 1                 | 3                 | 3912.1279        | 0.0000                              |
| 4  | 0                | 4                | 3   | 0                 | 3                 | 3923.4270        | 0.0004                              |
| 4  | 1                | 4                | 3   | 0                 | 3                 | 3926.1921        | -0.0022                             |
| 4  | 1                | 3                | 3   | 2                 | 2                 | 4385.8828        | 0.0111                              |
| 4  | 2                | 3                | 3   | 2                 | 2                 | 4476.1959        | -0.0022                             |
| 3  | 2                | 1                | 2   | 1                 | 1                 | 4496.6700        | 0.0010                              |
| 4  | 1                | 3                | 3   | 1                 | 2                 | 4642.8506        | 0.0003                              |
| 3  | 2                | 2                | 2   | 1                 | 2                 | 4698.3986        | 0.0127                              |
| 4  | 2                | 3                | 3   | 1                 | 2                 | 4733.1649        | -0.0117                             |
| 4  | 3                | 2                | 3   | 3                 | 1                 | 4782.4227        | 0.0006                              |
| 5  | 0                | 5                | 4   | 1                 | 4                 | 4814.0629        | 0.0108                              |
| 5  | 1                | 5                | 4   | 1                 | 4                 | 4814.5413        | -0.0013                             |
| 5  | 0                | 5                | 4   | 0                 | 4                 | 4816.8190        | -0.0008                             |
| 5  | 1                | 5                | 4   | 0                 | 4                 | 4817.3097        | -0.0006                             |
| 3  | 3                | 1                | 2   | 2                 | 0                 | 4833.3003        | 0.0031                              |
| 3  | 3                | 0                | 2   | 2                 | 0                 | 4896.6443        | -0.0079                             |
| 3  | 3                | 1                | 2   | 2                 | 1                 | 4978.1331        | 0.0023                              |
| 3  | 3                | 0                | 2   | 2                 | 1                 | 5041.4823        | -0.0036                             |
| 4  | 3                | 1                | 3   | 3                 | 0                 | 5056.9071        | -0.0045                             |
| 4  | 2                | 2                | 3   | 2                 | 1                 | 5128.4440        | -0.0024                             |
| 5  | 1                | 4                | 4   | 2                 | 3                 | 5412.5518        | 0.0034                              |
| 5  | 2                | 4                | 4   | 2                 | 3                 | 5436.0977        | -0.0035                             |
| 5  | 1                | 4                | 4   | 1                 | 3                 | 5502.8757        | 0.0010                              |
| 5  | 2                | 4                | 4   | 1                 | 3                 | 5526.4325        | 0.0050                              |
| 6  | 1                | 6                | 5   | 1                 | 5                 | 5713.6228        | -0.0001                             |
| 6  | 0                | 6                | 5   | 0                 | 5                 | 5714.0253        | -0.0066                             |
| 4  | 3                | 2                | 3   | 2                 | 1                 | 5759.4119        | -0.0002                             |
| 5  | 3                | 3                | 4   | 3                 | 2                 | 5896.3194        | -0.0043                             |
| 4  | 2                | 2                | 3   | 1                 | 2                 | 5937.6256        | -0.0014                             |
| 5  | 4                | 2                | 4   | 4                 | 1                 | 6060.3312        | -0.0005                             |
| 4  | 3                | 1                | 3   | 2                 | 1                 | 6097.2585        | 0.0020                              |
| 4  | 1                | 3                | 3   | 0                 | 3                 | 6101.3953        | 0.0003                              |
| 4  | 2                | 3                | 3   | 1                 | 3                 | 6177.6549        | 0.0000                              |
| 5  | 4                | 1                | 4   | 4                 | 0                 | 6205.3253        | -0.0023                             |
| 5  | 2                | 3                | 4   | 2                 | 2                 | 6222.4889        | 0.0011                              |
| 4  | 3                | 2                | 3   | 2                 | 2                 | 6311.6153        | 0.0011                              |
| 6  | 1                | 5                | 5   | 2                 | 4                 | 6350.6128        | -0.0039                             |
| 6  | 2                | 5                | 5   | 2                 | 4                 | 6355.7823        | -0.0029                             |
| 6  | 1                | 5                | 5   | 1                 | 4                 | 6374.1669        | -0.0026                             |
| 6  | 2                | 5                | 5   | 1                 | 4                 | 6379.3422        | 0.0042                              |
| 5  | 3                | 2                | 4   | 3                 | 1                 | 6457.0938        | -0.0023                             |
| 5  | 3                | 3                | 4   | 2                 | 2                 | 6527.2989        | 0.0095                              |
| 4  | 4                | 1                | 3   | 3                 | 0                 | 6618.3448        | -0.0010                             |
| 4  | 4                | 0                | 3   | 3                 | 0                 | 6641.2434        | 0.0001                              |
| 4  | 3                | 1                | 3   | 2                 | 2                 | 6649.4600        | 0.0013                              |
| 4  | 4                | 1                | 3   | 3                 | 1                 | 6681.6995        | -0.0013                             |
| 4  | 4                | 0                | 3   | 3                 | 1                 | 6704.6007        | 0.0024                              |
| 6  | 2                | 4                | 5   | 3                 | 3                 | 6819.7880        | 0.0094                              |
| 6  | 3                | 4                | 5   | 3                 | 3                 | 6925.7809        | -0.0020                             |
| 6  | 2                | 4                | 5   | 2                 | 3                 | 7124.5692        | -0.0110                             |
| 6  | 3                | 4                | 5   | 2                 | 3                 | 7230.5949        | 0.0104                              |
| 6  | 4                | 3                | 5   | 4                 | 2                 | 7252.3311        | 0.0064                              |
| 7  | 2                | 6                | 6   | 2                 | 5                 | 7259.4120        | 0.0027                              |

|   |   |   |   |   |   |           |         |
|---|---|---|---|---|---|-----------|---------|
| 7 | 1 | 6 | 6 | 1 | 5 | 7263.5559 | -0.0003 |
| 7 | 2 | 6 | 6 | 1 | 5 | 7264.5808 | 0.0030  |
| 6 | 5 | 2 | 5 | 5 | 1 | 7300.2319 | 0.0009  |
| 5 | 3 | 2 | 4 | 2 | 2 | 7425.9071 | 0.0009  |
| 8 | 0 | 8 | 7 | 1 | 7 | 7510.3538 | 0.0013  |
| 8 | 1 | 8 | 7 | 1 | 7 | 7510.3538 | 0.0013  |
| 8 | 0 | 8 | 7 | 0 | 7 | 7510.3538 | 0.0013  |
| 8 | 1 | 8 | 7 | 0 | 7 | 7510.3538 | 0.0013  |
| 5 | 2 | 3 | 4 | 1 | 3 | 7517.2633 | -0.0013 |
| 6 | 4 | 2 | 5 | 4 | 1 | 7665.0885 | -0.0006 |
| 5 | 1 | 4 | 4 | 0 | 4 | 7680.8438 | 0.0007  |
| 5 | 2 | 4 | 4 | 1 | 4 | 7701.6282 | 0.0001  |
| 6 | 3 | 3 | 5 | 3 | 2 | 7710.7378 | 0.0004  |
| 5 | 3 | 3 | 4 | 2 | 3 | 7731.7384 | -0.0015 |
| 5 | 4 | 1 | 4 | 3 | 1 | 7789.6585 | -0.0008 |
| 7 | 3 | 5 | 6 | 3 | 4 | 7885.0229 | -0.0009 |
| 5 | 4 | 2 | 4 | 3 | 2 | 7959.6108 | 0.0005  |
| 7 | 2 | 5 | 6 | 2 | 4 | 7962.1564 | -0.0045 |
| 7 | 3 | 5 | 6 | 2 | 4 | 7991.0215 | -0.0066 |

---

**Table S3.** Measured frequencies and residuals (in MHz) for the rotational transitions of the  $^{13}\text{C}_1$  isotopologue of conformer I.

| J' | K'_{-1} | K'_{+1} | J'' | K''_{-1} | K''_{+1} | V <sub>obs</sub> | V <sub>obs</sub> -V <sub>calc</sub> |
|----|---------|---------|-----|----------|----------|------------------|-------------------------------------|
| 3  | 2       | 1       | 2   | 1        | 1        | 4470.5727        | 0.0050                              |
| 3  | 3       | 0       | 2   | 2        | 0        | 4886.8864        | -0.0032                             |
| 3  | 3       | 1       | 2   | 2        | 1        | 4967.1840        | 0.0017                              |
| 4  | 2       | 2       | 3   | 1        | 2        | 5894.6243        | 0.0051                              |
| 4  | 3       | 1       | 3   | 2        | 1        | 6070.4794        | 0.0078                              |
| 4  | 3       | 2       | 3   | 2        | 2        | 6286.4521        | 0.0055                              |
| 4  | 4       | 0       | 3   | 3        | 0        | 6630.9947        | -0.0023                             |
| 4  | 4       | 1       | 3   | 3        | 1        | 6669.4630        | 0.0014                              |
| 5  | 3       | 2       | 4   | 2        | 2        | 7378.4794        | -0.0066                             |
| 5  | 2       | 3       | 4   | 1        | 3        | 7459.4194        | -0.0042                             |
| 5  | 4       | 1       | 4   | 3        | 1        | 7766.6218        | -0.0051                             |
| 5  | 4       | 2       | 4   | 3        | 2        | 7932.7193        | -0.0002                             |

**Table S4.** Measured frequencies and residuals (in MHz) for the rotational transitions of the  $^{13}\text{C}_2$  isotopologue of conformer I.

| J' | K'_{-1} | K'_{+1} | J'' | K''_{-1} | K''_{+1} | V <sub>obs</sub> | V <sub>obs</sub> -V <sub>calc</sub> |
|----|---------|---------|-----|----------|----------|------------------|-------------------------------------|
| 3  | 2       | 1       | 2   | 1        | 1        | 4467.0738        | -0.0035                             |
| 3  | 3       | 0       | 2   | 2        | 0        | 4869.4408        | -0.0029                             |
| 3  | 3       | 1       | 2   | 2        | 1        | 4950.3413        | 0.0023                              |
| 4  | 3       | 1       | 3   | 2        | 1        | 6059.2971        | -0.0049                             |
| 4  | 1       | 3       | 3   | 0        | 3        | 6060.0375        | 0.0036                              |
| 4  | 2       | 3       | 3   | 1        | 3        | 6137.8253        | 0.0136                              |
| 4  | 4       | 0       | 3   | 3        | 0        | 6605.2172        | 0.0015                              |
| 4  | 4       | 1       | 3   | 3        | 1        | 6645.0397        | 0.0008                              |
| 5  | 3       | 2       | 4   | 2        | 2        | 7375.8864        | 0.0016                              |
| 5  | 2       | 3       | 4   | 1        | 3        | 7464.4933        | -0.0046                             |
| 5  | 3       | 3       | 4   | 2        | 3        | 7682.4172        | -0.0017                             |
| 5  | 4       | 1       | 4   | 3        | 1        | 7744.0833        | 0.0065                              |
| 5  | 4       | 2       | 4   | 3        | 2        | 7912.4822        | -0.0110                             |

**Table S5.** Measured frequencies and residuals (in MHz) for the rotational transitions of the  $^{13}\text{C}_3$  isotopologue of conformer I.

| J' | K'_{-1} | K'_{+1} | J'' | K''_{-1} | K''_{+1} | V <sub>obs</sub> | V <sub>obs</sub> -V <sub>calc</sub> |
|----|---------|---------|-----|----------|----------|------------------|-------------------------------------|
| 2  | 2       | 0       | 1   | 1        | 0        | 3172.4206        | -0.0009                             |
| 3  | 2       | 1       | 2   | 1        | 1        | 4478.8613        | -0.0097                             |
| 3  | 3       | 0       | 2   | 2        | 0        | 4863.9617        | 0.0079                              |
| 3  | 3       | 1       | 2   | 2        | 1        | 4945.5705        | -0.0029                             |
| 4  | 2       | 2       | 3   | 1        | 2        | 5920.1820        | -0.0069                             |
| 4  | 3       | 1       | 3   | 2        | 1        | 6067.1539        | 0.0047                              |
| 4  | 1       | 3       | 3   | 0        | 3        | 6081.0965        | 0.0008                              |
| 4  | 2       | 3       | 3   | 1        | 3        | 6151.4691        | 0.0057                              |
| 4  | 3       | 2       | 3   | 2        | 2        | 6278.4075        | 0.0078                              |
| 4  | 4       | 1       | 3   | 3        | 1        | 6636.2535        | -0.0048                             |
| 5  | 3       | 2       | 4   | 2        | 2        | 7399.7829        | 0.0047                              |
| 5  | 3       | 3       | 4   | 2        | 3        | 7697.4208        | -0.0012                             |
| 5  | 4       | 1       | 4   | 3        | 1        | 7743.1686        | -0.0042                             |
| 5  | 4       | 2       | 4   | 3        | 2        | 7914.3196        | -0.0020                             |



**Table S6.** Measured frequencies and residuals (in MHz) for the rotational transitions of the  $^{13}\text{C}_4$  isotopologue of conformer I.

| J' | K'_{-1} | K'_{+1} | J'' | K''_{-1} | K''_{+1} | Vobs      | Vobs-Vcalc |
|----|---------|---------|-----|----------|----------|-----------|------------|
| 3  | 2       | 1       | 2   | 1        | 1        | 4482.0418 | 0.0022     |
| 3  | 3       | 0       | 2   | 2        | 0        | 4863.6382 | 0.0095     |
| 3  | 3       | 1       | 2   | 2        | 1        | 4945.4462 | 0.0058     |
| 4  | 2       | 2       | 3   | 1        | 2        | 5926.0976 | -0.0034    |
| 4  | 3       | 1       | 3   | 2        | 1        | 6069.7769 | 0.0073     |
| 4  | 2       | 3       | 3   | 1        | 3        | 6155.3042 | -0.0086    |
| 4  | 3       | 2       | 3   | 2        | 2        | 6280.5171 | 0.0039     |
| 4  | 4       | 0       | 3   | 3        | 0        | 6593.5687 | -0.0012    |
| 4  | 4       | 1       | 3   | 3        | 1        | 6635.5846 | -0.0009    |
| 5  | 3       | 2       | 4   | 2        | 2        | 7405.9726 | 0.0042     |
| 5  | 2       | 4       | 4   | 1        | 4        | 7675.9080 | 0.0035     |
| 5  | 4       | 1       | 4   | 3        | 1        | 7744.2274 | -0.0063    |
| 5  | 4       | 2       | 4   | 3        | 2        | 7916.0184 | -0.0094    |

**Table S7.** Measured frequencies and residuals (in MHz) for the rotational transitions of the  $^{13}\text{C}_5$  isotopologue of conformer I.

| J' | K'_{-1} | K'_{+1} | J'' | K''_{-1} | K''_{+1} | Vobs      | Vobs-Vcalc |
|----|---------|---------|-----|----------|----------|-----------|------------|
| 3  | 2       | 1       | 2   | 1        | 1        | 4473.0510 | 0.0115     |
| 3  | 3       | 0       | 2   | 2        | 0        | 4862.2706 | -0.0002    |
| 3  | 3       | 1       | 2   | 2        | 1        | 4943.7396 | 0.0018     |
| 4  | 2       | 2       | 3   | 1        | 2        | 5910.5047 | -0.0067    |
| 4  | 3       | 1       | 3   | 2        | 1        | 6061.2276 | -0.0022    |
| 4  | 3       | 2       | 3   | 2        | 2        | 6273.1947 | 0.0103     |
| 4  | 4       | 0       | 3   | 3        | 0        | 6593.2107 | 0.0004     |
| 5  | 3       | 2       | 4   | 2        | 2        | 7389.0269 | 0.0054     |
| 5  | 3       | 3       | 4   | 2        | 3        | 7688.8439 | -0.0087    |
| 5  | 4       | 1       | 4   | 3        | 1        | 7738.3317 | -0.0045    |
| 5  | 4       | 2       | 4   | 3        | 2        | 7908.8884 | -0.0015    |

**Table S8.** Measured frequencies and residuals (in MHz) for the rotational transitions of the  $^{13}\text{C}_6$  isotopologue of conformer I.

| J' | K'_{-1} | K'_{+1} | J'' | K''_{-1} | K''_{+1} | Vobs      | Vobs-Vcalc |
|----|---------|---------|-----|----------|----------|-----------|------------|
| 2  | 2       | 0       | 1   | 1        | 0        | 3179.9957 | -0.0106    |
| 3  | 2       | 1       | 2   | 1        | 1        | 4474.9071 | -0.0068    |
| 3  | 3       | 1       | 2   | 2        | 1        | 4963.7167 | 0.0064     |
| 4  | 2       | 2       | 3   | 1        | 2        | 5904.1845 | -0.0020    |
| 4  | 1       | 3       | 3   | 0        | 3        | 6068.5634 | 0.0071     |
| 4  | 3       | 1       | 3   | 2        | 1        | 6072.4505 | 0.0016     |
| 4  | 2       | 3       | 3   | 1        | 3        | 6148.8934 | -0.0066    |
| 4  | 3       | 2       | 3   | 2        | 2        | 6287.2536 | 0.0022     |
| 4  | 4       | 0       | 3   | 3        | 0        | 6624.4403 | -0.0013    |
| 4  | 4       | 1       | 3   | 3        | 1        | 6663.6852 | 0.0014     |
| 5  | 3       | 2       | 4   | 2        | 2        | 7387.5969 | 0.0108     |
| 5  | 2       | 3       | 4   | 1        | 3        | 7473.0248 | -0.0058    |
| 5  | 3       | 3       | 4   | 2        | 3        | 7697.0055 | 0.0004     |
| 5  | 4       | 1       | 4   | 3        | 1        | 7764.0896 | -0.0027    |

**Table S9.** Measured frequencies and residuals (in MHz) for the rotational transitions of the  $^{13}\text{C}_7$  isotopologue of conformer I.

| J' | K'_{-1} | K'_{+1} | J'' | K''_{-1} | K''_{+1} | Vobs      | Vobs-Vcalc |
|----|---------|---------|-----|----------|----------|-----------|------------|
| 3  | 2       | 1       | 2   | 1        | 1        | 4479.6446 | 0.0091     |
| 3  | 3       | 0       | 2   | 2        | 0        | 4891.5926 | 0.0070     |
| 3  | 3       | 1       | 2   | 2        | 1        | 4972.3154 | 0.0035     |
| 4  | 2       | 2       | 3   | 1        | 2        | 5909.0484 | -0.0036    |
| 4  | 3       | 1       | 3   | 2        | 1        | 6080.2986 | 0.0032     |
| 4  | 2       | 3       | 3   | 1        | 3        | 6155.9684 | -0.0006    |
| 4  | 3       | 2       | 3   | 2        | 2        | 6296.0461 | -0.0001    |
| 4  | 4       | 1       | 3   | 3        | 1        | 6675.6513 | -0.0038    |
| 5  | 3       | 2       | 4   | 2        | 2        | 7394.6437 | 0.0003     |
| 5  | 3       | 3       | 4   | 2        | 3        | 7706.2133 | -0.0019    |
| 5  | 4       | 1       | 4   | 3        | 1        | 7776.0255 | -0.0063    |

**Table S10.** Measured frequencies and residuals (in MHz) for the rotational transitions of the  $^{13}\text{C}_8$  isotopologue of conformer I.

| J' | K'_{-1} | K'_{+1} | J'' | K''_{-1} | K''_{+1} | Vobs      | Vobs-Vcalc |
|----|---------|---------|-----|----------|----------|-----------|------------|
| 3  | 2       | 1       | 2   | 1        | 1        | 4470.7763 | 0.0030     |
| 3  | 3       | 0       | 2   | 2        | 0        | 4885.8461 | 0.0065     |
| 3  | 3       | 1       | 2   | 2        | 1        | 4966.2500 | 0.0023     |
| 4  | 2       | 2       | 3   | 1        | 2        | 5895.5499 | -0.0042    |
| 4  | 1       | 3       | 3   | 0        | 3        | 6060.8839 | 0.0086     |
| 4  | 3       | 1       | 3   | 2        | 1        | 6070.0972 | -0.0037    |
| 4  | 3       | 2       | 3   | 2        | 2        | 6285.9983 | -0.0007    |
| 4  | 4       | 0       | 3   | 3        | 0        | 6629.3987 | 0.0000     |
| 4  | 4       | 1       | 3   | 3        | 1        | 6668.0277 | -0.0033    |
| 5  | 3       | 2       | 4   | 2        | 2        | 7379.1316 | 0.0077     |
| 5  | 2       | 3       | 4   | 1        | 3        | 7460.9559 | -0.0078    |
| 5  | 4       | 1       | 4   | 3        | 1        | 7765.3418 | -0.0043    |

**Table S11.** Measured frequencies and residuals (in MHz) for the rotational transitions of the  $^{13}\text{C}_9$  isotopologue of conformer I.

| J' | K'_{-1} | K'_{+1} | J'' | K''_{-1} | K''_{+1} | Vobs      | Vobs-Vcalc |
|----|---------|---------|-----|----------|----------|-----------|------------|
| 2  | 2       | 0       | 1   | 1        | 0        | 3169.6056 | -0.0115    |
| 3  | 2       | 1       | 2   | 1        | 1        | 4468.9290 | 0.0064     |
| 3  | 2       | 2       | 2   | 1        | 2        | 4668.2718 | -0.0128    |
| 3  | 3       | 0       | 2   | 2        | 0        | 4862.6614 | -0.0029    |
| 3  | 3       | 1       | 2   | 2        | 1        | 4943.9062 | 0.0042     |
| 4  | 2       | 2       | 3   | 1        | 2        | 5902.8770 | 0.0024     |
| 4  | 3       | 1       | 3   | 2        | 1        | 6057.8209 | -0.0017    |
| 4  | 3       | 2       | 3   | 2        | 2        | 6270.4340 | 0.0025     |
| 4  | 4       | 0       | 3   | 3        | 0        | 6594.5753 | 0.0063     |
| 4  | 4       | 1       | 3   | 3        | 1        | 6635.2487 | 0.0016     |
| 5  | 3       | 3       | 4   | 2        | 3        | 7683.1577 | 0.0034     |
| 5  | 4       | 1       | 4   | 3        | 1        | 7736.9114 | 0.0022     |
| 5  | 4       | 2       | 4   | 3        | 2        | 7906.6513 | -0.0068    |

**Table S12.** Measured frequencies and residuals (in MHz) for the rotational transitions of the  $^{13}\text{C}_{10}$  isotopologue of conformer I.

| J' | K'-1 | K'+1 | J'' | K''-1 | K''+1 | Vobs      | Vobs-Vcalc |
|----|------|------|-----|-------|-------|-----------|------------|
| 2  | 2    | 0    | 1   | 1     | 0     | 3173.2110 | -0.0042    |
| 3  | 2    | 1    | 2   | 1     | 1     | 4481.6301 | 0.0030     |
| 3  | 3    | 0    | 2   | 2     | 0     | 4864.3305 | 0.0007     |
| 3  | 3    | 1    | 2   | 2     | 1     | 4946.1007 | 0.0035     |
| 4  | 2    | 2    | 3   | 1     | 2     | 5925.0395 | 0.0045     |
| 4  | 3    | 1    | 3   | 2     | 1     | 6069.7076 | -0.0091    |
| 4  | 2    | 3    | 3   | 1     | 3     | 6154.9048 | -0.0011    |
| 4  | 3    | 2    | 3   | 2     | 2     | 6280.6435 | -0.0050    |
| 5  | 3    | 2    | 4   | 2     | 2     | 7404.9953 | -0.0001    |
| 5  | 4    | 1    | 4   | 3     | 1     | 7744.8660 | 0.0060     |

**Table S13.** Measured frequencies and residuals (in MHz) for the rotational transitions of the  $^{13}\text{C}_{11}$  isotopologue of conformer I.

| J' | K'-1 | K'+1 | J'' | K''-1 | K''+1 | Vobs      | Vobs-Vcalc |
|----|------|------|-----|-------|-------|-----------|------------|
| 3  | 3    | 0    | 2   | 2     | 0     | 4862.8183 | 0.0082     |
| 3  | 3    | 1    | 2   | 2     | 1     | 4944.4437 | 0.0012     |
| 4  | 2    | 2    | 3   | 1     | 2     | 5922.2546 | 0.0023     |
| 4  | 3    | 1    | 3   | 2     | 1     | 6067.4833 | -0.0088    |
| 4  | 1    | 3    | 3   | 0     | 3     | 6082.7368 | -0.0013    |
| 4  | 2    | 3    | 3   | 1     | 3     | 6152.3226 | 0.0074     |
| 4  | 3    | 2    | 3   | 2     | 2     | 6278.2861 | -0.0098    |
| 4  | 4    | 0    | 3   | 3     | 0     | 6592.7185 | 0.0048     |
| 4  | 4    | 1    | 3   | 3     | 1     | 6634.4679 | -0.0042    |
| 5  | 3    | 2    | 4   | 2     | 2     | 7401.7854 | 0.0038     |
| 5  | 3    | 3    | 4   | 2     | 3     | 7698.2759 | -0.0019    |
| 5  | 4    | 1    | 4   | 3     | 1     | 7742.3892 | 0.0029     |
| 5  | 4    | 2    | 4   | 3     | 2     | 7913.6761 | -0.0027    |

**Table S14.** Measured frequencies and residuals (in MHz) for the rotational transitions of the  $^{13}\text{C}_{12}$  isotopologue of conformer I.

| J' | K'-1 | K'+1 | J'' | K''-1 | K''+1 | Vobs      | Vobs-Vcalc |
|----|------|------|-----|-------|-------|-----------|------------|
| 2  | 2    | 0    | 1   | 1     | 0     | 3173.6023 | -0.0040    |
| 3  | 2    | 1    | 2   | 1     | 1     | 4472.3197 | -0.0011    |
| 3  | 3    | 0    | 2   | 2     | 0     | 4869.9388 | -0.0017    |
| 3  | 3    | 1    | 2   | 2     | 1     | 4951.0496 | -0.0013    |
| 4  | 2    | 2    | 3   | 1     | 2     | 5905.6526 | 0.0007     |
| 4  | 3    | 1    | 3   | 2     | 1     | 6064.1002 | 0.0031     |
| 4  | 1    | 3    | 3   | 0     | 3     | 6068.5634 | -0.0089    |
| 4  | 3    | 2    | 3   | 2     | 2     | 6277.3674 | 0.0032     |
| 4  | 4    | 0    | 3   | 3     | 0     | 6605.0041 | -0.0035    |
| 4  | 4    | 1    | 3   | 3     | 1     | 6645.3194 | 0.0002     |
| 5  | 3    | 2    | 4   | 2     | 2     | 7385.7537 | -0.0091    |
| 5  | 2    | 3    | 4   | 1     | 3     | 7476.9315 | 0.0040     |
| 5  | 3    | 3    | 4   | 2     | 3     | 7689.9191 | 0.0122     |
| 5  | 4    | 1    | 4   | 3     | 1     | 7747.1270 | 0.0017     |
| 5  | 4    | 2    | 4   | 3     | 2     | 7916.3410 | -0.0006    |

**Table S15.** Measured frequencies and residuals (in MHz) for the rotational transitions of conformer II.

| J' | K'_{-1} | K'_{+1} | J'' | K''_{-1} | K''_{+1} | V <sub>obs</sub> | V <sub>obs</sub> -V <sub>calc</sub> |
|----|---------|---------|-----|----------|----------|------------------|-------------------------------------|
| 4  | 1       | 3       | 3   | 0        | 3        | 5996.7302        | -0.0032                             |
| 5  | 1       | 4       | 4   | 0        | 4        | 7588.5744        | 0.0109                              |
| 3  | 2       | 1       | 2   | 1        | 1        | 4474.7078        | 0.0037                              |
| 4  | 2       | 2       | 3   | 1        | 2        | 5834.9445        | -0.0058                             |
| 5  | 2       | 3       | 4   | 1        | 3        | 7342.0322        | -0.0010                             |
| 4  | 2       | 3       | 3   | 1        | 3        | 6153.2563        | -0.0069                             |
| 3  | 3       | 0       | 2   | 2        | 0        | 5021.9413        | 0.0120                              |
| 4  | 3       | 1       | 3   | 2        | 1        | 6146.8083        | 0.0003                              |
| 5  | 3       | 2       | 4   | 2        | 2        | 7364.0171        | 0.0017                              |
| 3  | 3       | 1       | 2   | 2        | 1        | 5093.0474        | 0.0014                              |
| 4  | 3       | 2       | 3   | 2        | 2        | 6368.4064        | 0.0011                              |
| 5  | 3       | 3       | 4   | 2        | 3        | 7726.2372        | -0.0020                             |
| 4  | 4       | 0       | 3   | 3        | 0        | 6829.9276        | -0.0004                             |
| 4  | 4       | 1       | 3   | 3        | 1        | 6856.3795        | -0.0079                             |
| 5  | 4       | 1       | 4   | 3        | 1        | 7939.6690        | -0.0017                             |

**Table S16.** Measured frequencies and residuals (in MHz) for the rotational transitions of the parent species of conformer III.

| J' | K' <sub>-1</sub> | K' <sub>+1</sub> | J'' | K'' <sub>-1</sub> | K'' <sub>+1</sub> | V <sub>obs</sub> | V <sub>obs</sub> -V <sub>calc</sub> |
|----|------------------|------------------|-----|-------------------|-------------------|------------------|-------------------------------------|
| 3  | 0                | 3                | 2   | 1                 | 2                 | 2871.2892        | 0.0151                              |
| 2  | 1                | 1                | 1   | 0                 | 1                 | 2881.7420        | -0.0021                             |
| 3  | 1                | 3                | 2   | 1                 | 2                 | 2968.0578        | -0.0044                             |
| 3  | 0                | 3                | 2   | 0                 | 2                 | 3073.0396        | 0.0050                              |
| 2  | 2                | 0                | 1   | 1                 | 0                 | 3411.0624        | -0.0013                             |
| 3  | 1                | 2                | 2   | 1                 | 1                 | 3509.4802        | -0.0062                             |
| 2  | 2                | 1                | 1   | 1                 | 1                 | 3536.8548        | -0.0073                             |
| 4  | 0                | 4                | 3   | 1                 | 3                 | 3872.5035        | -0.0052                             |
| 4  | 1                | 4                | 3   | 1                 | 3                 | 3911.1105        | 0.0018                              |
| 4  | 0                | 4                | 3   | 0                 | 3                 | 3969.2944        | -0.0025                             |
| 3  | 1                | 2                | 2   | 0                 | 2                 | 4265.1235        | 0.0005                              |
| 4  | 2                | 3                | 3   | 2                 | 2                 | 4322.9323        | -0.0109                             |
| 3  | 2                | 1                | 2   | 1                 | 1                 | 4523.2695        | 0.0005                              |
| 4  | 1                | 3                | 3   | 1                 | 2                 | 4580.5476        | -0.0037                             |
| 3  | 2                | 2                | 2   | 1                 | 2                 | 4813.9433        | -0.0096                             |
| 5  | 0                | 5                | 4   | 1                 | 4                 | 4822.4448        | -0.0013                             |
| 5  | 1                | 5                | 4   | 1                 | 4                 | 4836.2002        | 0.0070                              |
| 5  | 1                | 5                | 4   | 0                 | 4                 | 4874.7855        | -0.0077                             |
| 5  | 2                | 4                | 4   | 2                 | 3                 | 5332.7728        | 0.0099                              |
| 3  | 3                | 1                | 2   | 2                 | 0                 | 5350.3424        | 0.0115                              |
| 3  | 3                | 0                | 2   | 2                 | 0                 | 5362.7865        | 0.0037                              |
| 3  | 3                | 1                | 2   | 2                 | 1                 | 5409.1642        | 0.0064                              |
| 5  | 1                | 4                | 4   | 1                 | 3                 | 5555.6809        | 0.0020                              |
| 4  | 2                | 2                | 3   | 1                 | 2                 | 5735.1231        | -0.0020                             |
| 6  | 0                | 6                | 5   | 1                 | 5                 | 5746.6377        | -0.0021                             |
| 6  | 1                | 6                | 5   | 1                 | 5                 | 5751.2032        | -0.0034                             |
| 6  | 0                | 6                | 5   | 0                 | 5                 | 5760.3900        | 0.0031                              |
| 4  | 1                | 3                | 3   | 0                 | 3                 | 5772.6360        | -0.0037                             |
| 5  | 2                | 3                | 4   | 2                 | 2                 | 5917.5364        | 0.0045                              |
| 4  | 2                | 3                | 3   | 1                 | 3                 | 6168.8366        | 0.0027                              |
| 6  | 1                | 5                | 5   | 2                 | 4                 | 6182.2575        | 0.0155                              |
| 6  | 2                | 5                | 5   | 2                 | 4                 | 6306.9305        | 0.0049                              |
| 4  | 3                | 1                | 3   | 2                 | 1                 | 6409.4431        | -0.0004                             |
| 6  | 1                | 5                | 5   | 1                 | 4                 | 6452.3062        | -0.0022                             |
| 6  | 2                | 5                | 5   | 1                 | 4                 | 6576.9814        | -0.0106                             |
| 4  | 3                | 2                | 3   | 2                 | 2                 | 6591.1270        | 0.0021                              |
| 7  | 0                | 7                | 6   | 1                 | 6                 | 6660.1861        | 0.0075                              |
| 7  | 1                | 7                | 6   | 1                 | 6                 | 6661.6125        | -0.0144                             |
| 7  | 0                | 7                | 6   | 0                 | 6                 | 6664.7527        | 0.0074                              |
| 5  | 2                | 3                | 4   | 1                 | 3                 | 7072.0972        | -0.0084                             |
| 4  | 4                | 1                | 3   | 3                 | 0                 | 7311.0447        | 0.0114                              |
| 4  | 4                | 0                | 3   | 3                 | 0                 | 7313.2001        | -0.0003                             |
| 4  | 4                | 1                | 3   | 3                 | 1                 | 7323.4857        | 0.0005                              |
| 4  | 4                | 0                | 3   | 3                 | 1                 | 7325.6459        | -0.0064                             |
| 7  | 1                | 6                | 6   | 1                 | 5                 | 7325.8971        | -0.0024                             |
| 5  | 1                | 4                | 4   | 0                 | 4                 | 7359.0263        | 0.0046                              |
| 5  | 3                | 2                | 4   | 2                 | 2                 | 7460.6345        | -0.0046                             |
| 5  | 2                | 4                | 4   | 1                 | 4                 | 7590.4880        | -0.0001                             |
| 5  | 3                | 3                | 4   | 2                 | 3                 | 7837.4134        | -0.0053                             |

**Table S17.** Measured frequencies and residuals (in MHz) for the rotational transitions of conformer IV.

| J' | K' <sub>-1</sub> | K' <sub>+1</sub> | J'' | K'' <sub>-1</sub> | K'' <sub>+1</sub> | V <sub>obs</sub> | V <sub>obs</sub> -V <sub>calc</sub> |
|----|------------------|------------------|-----|-------------------|-------------------|------------------|-------------------------------------|
| 2  | 1                | 1                | 1   | 0                 | 1                 | 3088.1067        | 0.0034                              |
| 2  | 2                | 0                | 1   | 1                 | 0                 | 3252.4771        | -0.0059                             |
| 2  | 2                | 1                | 1   | 1                 | 1                 | 3345.6626        | -0.0059                             |
| 3  | 2                | 1                | 2   | 1                 | 1                 | 4658.4603        | 0.0025                              |
| 3  | 1                | 2                | 2   | 0                 | 2                 | 4697.8200        | 0.0056                              |
| 3  | 2                | 2                | 2   | 1                 | 2                 | 4825.3180        | -0.0073                             |
| 3  | 3                | 0                | 2   | 2                 | 0                 | 4952.8270        | 0.0007                              |
| 3  | 3                | 1                | 2   | 2                 | 1                 | 5038.3542        | -0.0023                             |
| 4  | 2                | 2                | 3   | 1                 | 2                 | 6203.2278        | -0.0039                             |
| 4  | 3                | 1                | 3   | 2                 | 1                 | 6268.6642        | -0.0027                             |
| 4  | 1                | 3                | 3   | 0                 | 3                 | 6341.2806        | -0.0024                             |
| 4  | 2                | 3                | 3   | 1                 | 3                 | 6377.7866        | 0.0057                              |
| 4  | 3                | 2                | 3   | 2                 | 2                 | 6461.9631        | -0.0050                             |
| 4  | 4                | 0                | 3   | 3                 | 0                 | 6693.4340        | 0.0045                              |
| 4  | 4                | 1                | 3   | 3                 | 1                 | 6747.2680        | -0.0013                             |
| 5  | 3                | 2                | 4   | 2                 | 2                 | 7727.3472        | -0.0133                             |
| 5  | 2                | 3                | 4   | 1                 | 3                 | 7859.1029        | -0.0117                             |
| 5  | 4                | 1                | 4   | 3                 | 1                 | 7937.9156        | -0.0041                             |
| 5  | 1                | 4                | 4   | 0                 | 4                 | 7956.2172        | 0.0134                              |
| 5  | 2                | 4                | 4   | 1                 | 4                 | 7963.6123        | 0.0007                              |
| 5  | 3                | 3                | 4   | 2                 | 3                 | 7971.6436        | -0.0095                             |

**Table S18.** Measured frequencies and residuals (in MHz) for the rotational transitions of conformer V.

| J' | K' <sub>-1</sub> | K' <sub>+1</sub> | J'' | K'' <sub>-1</sub> | K'' <sub>+1</sub> | V <sub>obs</sub> | V <sub>obs</sub> -V <sub>calc</sub> |
|----|------------------|------------------|-----|-------------------|-------------------|------------------|-------------------------------------|
| 2  | 1                | 1                | 1   | 0                 | 1                 | 2890.2417        | -0.0115                             |
| 3  | 1                | 3                | 2   | 1                 | 2                 | 2934.5141        | -0.0033                             |
| 3  | 0                | 3                | 2   | 0                 | 2                 | 3046.6988        | -0.0013                             |
| 2  | 2                | 0                | 1   | 1                 | 0                 | 3467.0124        | 0.0029                              |
| 3  | 1                | 2                | 2   | 1                 | 1                 | 3482.8249        | -0.0042                             |
| 2  | 2                | 1                | 1   | 1                 | 1                 | 3596.9191        | 0.0007                              |
| 4  | 1                | 4                | 3   | 1                 | 3                 | 3867.2873        | 0.0040                              |
| 4  | 0                | 4                | 3   | 0                 | 3                 | 3932.3399        | 0.0104                              |
| 3  | 1                | 2                | 2   | 0                 | 2                 | 4265.9482        | 0.0165                              |
| 4  | 2                | 3                | 3   | 2                 | 2                 | 4282.5243        | 0.0077                              |
| 4  | 3                | 2                | 3   | 3                 | 1                 | 4414.7782        | -0.0152                             |
| 4  | 1                | 3                | 3   | 1                 | 2                 | 4549.9694        | 0.0030                              |
| 3  | 2                | 1                | 2   | 1                 | 1                 | 4561.3469        | -0.0018                             |
| 5  | 1                | 5                | 4   | 1                 | 4                 | 4781.6424        | 0.0073                              |
| 5  | 0                | 5                | 4   | 0                 | 4                 | 4810.7006        | -0.0038                             |
| 3  | 2                | 2                | 2   | 1                 | 2                 | 4865.3736        | -0.0028                             |
| 5  | 2                | 4                | 4   | 2                 | 3                 | 5284.6017        | -0.0166                             |
| 3  | 3                | 0                | 2   | 2                 | 0                 | 5464.8201        | 0.0002                              |
| 3  | 3                | 1                | 2   | 2                 | 1                 | 5510.1069        | 0.0006                              |
| 5  | 3                | 3                | 4   | 3                 | 2                 | 5515.6536        | -0.0026                             |
| 5  | 1                | 4                | 4   | 1                 | 3                 | 5523.8147        | 0.0054                              |
| 6  | 1                | 6                | 5   | 1                 | 5                 | 5685.2294        | -0.0023                             |
| 6  | 0                | 6                | 5   | 0                 | 5                 | 5696.4427        | 0.0043                              |
| 4  | 2                | 2                | 3   | 1                 | 2                 | 5754.4262        | -0.0012                             |
| 4  | 1                | 3                | 3   | 0                 | 3                 | 5769.1964        | -0.0016                             |
| 5  | 2                | 3                | 4   | 2                 | 2                 | 5869.0471        | 0.0053                              |
| 4  | 2                | 3                | 3   | 1                 | 3                 | 6213.3795        | 0.0038                              |
| 6  | 2                | 5                | 5   | 2                 | 4                 | 6251.3523        | -0.0038                             |
| 6  | 1                | 5                | 5   | 1                 | 4                 | 6415.0664        | -0.0010                             |
| 4  | 3                | 1                | 3   | 2                 | 1                 | 6498.4613        | -0.0001                             |
| 7  | 1                | 7                | 6   | 1                 | 6                 | 6583.6962        | -0.0006                             |
| 7  | 0                | 7                | 6   | 0                 | 6                 | 6587.6612        | -0.0021                             |
| 4  | 3                | 2                | 3   | 2                 | 2                 | 6679.1979        | -0.0017                             |
| 6  | 4                | 2                | 5   | 4                 | 1                 | 6725.7164        | -0.0159                             |
| 6  | 2                | 4                | 5   | 2                 | 3                 | 6986.9207        | 0.0070                              |
| 5  | 2                | 3                | 4   | 1                 | 3                 | 7073.5034        | 0.0007                              |
| 7  | 2                | 6                | 6   | 2                 | 5                 | 7188.2262        | -0.0022                             |
| 7  | 1                | 6                | 6   | 1                 | 5                 | 7275.9865        | 0.0119                              |
| 5  | 1                | 4                | 4   | 0                 | 4                 | 7360.6878        | 0.0100                              |
| 4  | 4                | 0                | 3   | 3                 | 0                 | 7458.1250        | -0.0034                             |
| 4  | 4                | 1                | 3   | 3                 | 1                 | 7467.6121        | -0.0053                             |
| 8  | 1                | 8                | 7   | 1                 | 7                 | 7480.0657        | -0.0017                             |
| 5  | 3                | 2                | 4   | 2                 | 2                 | 7528.5444        | 0.0050                              |
| 5  | 3                | 3                | 4   | 2                 | 3                 | 7912.3359        | -0.0032                             |

**Table S19.** Measured frequencies and residuals (in MHz) for the rotational transitions of conformer VI.

| J' | K' <sub>-1</sub> | K' <sub>+1</sub> | J'' | K'' <sub>-1</sub> | K'' <sub>+1</sub> | V <sub>obs</sub> | V <sub>obs</sub> -V <sub>calc</sub> |
|----|------------------|------------------|-----|-------------------|-------------------|------------------|-------------------------------------|
| 2  | 1                | 1                | 1   | 0                 | 1                 | 2948.8703        | -0.0065                             |
| 2  | 2                | 1                | 1   | 1                 | 1                 | 3423.5417        | -0.0056                             |
| 3  | 1                | 2                | 2   | 0                 | 2                 | 4436.8711        | -0.0018                             |
| 3  | 2                | 1                | 2   | 1                 | 1                 | 4519.2404        | 0.0035                              |
| 3  | 2                | 2                | 2   | 1                 | 2                 | 4779.3145        | -0.0035                             |
| 3  | 3                | 0                | 2   | 2                 | 0                 | 5121.7544        | -0.0088                             |
| 3  | 3                | 1                | 2   | 2                 | 1                 | 5194.1657        | -0.0092                             |
| 4  | 2                | 2                | 3   | 1                 | 2                 | 5873.2444        | 0.0026                              |
| 4  | 1                | 3                | 3   | 0                 | 3                 | 6038.0664        | 0.0072                              |
| 4  | 2                | 3                | 3   | 1                 | 3                 | 6220.8158        | -0.0004                             |
| 4  | 3                | 1                | 3   | 2                 | 1                 | 6232.1137        | -0.0046                             |
| 4  | 3                | 2                | 3   | 2                 | 2                 | 6463.7185        | -0.0075                             |
| 4  | 4                | 0                | 3   | 3                 | 0                 | 6973.0222        | -0.0246                             |
| 4  | 4                | 1                | 3   | 3                 | 1                 | 6998.6729        | -0.0295                             |
| 5  | 2                | 3                | 4   | 1                 | 3                 | 7380.7334        | -0.0019                             |
| 5  | 3                | 2                | 4   | 2                 | 2                 | 7431.1968        | -0.0042                             |
| 5  | 1                | 4                | 4   | 0                 | 4                 | 7651.9888        | -0.0024                             |
| 5  | 2                | 4                | 4   | 1                 | 4                 | 7723.3725        | 0.0063                              |
| 5  | 3                | 3                | 4   | 2                 | 3                 | 7818.6259        | -0.0073                             |



**Table S20.** Measured frequencies and residuals (in MHz) for the rotational transitions of conformer VII.

| J' | K' -1 | K' +1 | J'' | K'' -1 | K'' +1 | V <sub>obs</sub> | V <sub>obs</sub> -V <sub>calc</sub> |
|----|-------|-------|-----|--------|--------|------------------|-------------------------------------|
| 2  | 1     | 1     | 1   | 0      | 1      | 2996.6621        | -0.0045                             |
| 2  | 2     | 0     | 1   | 1      | 0      | 3382.2550        | -0.0010                             |
| 2  | 2     | 1     | 1   | 1      | 1      | 3512.7079        | 0.0074                              |
| 3  | 1     | 2     | 2   | 0      | 2      | 4497.5074        | -0.0034                             |
| 3  | 2     | 1     | 2   | 1      | 1      | 4607.7336        | 0.0050                              |
| 3  | 2     | 2     | 2   | 1      | 2      | 4882.0376        | 0.0123                              |
| 3  | 3     | 0     | 2   | 2      | 0      | 5266.5454        | 0.0056                              |
| 3  | 3     | 1     | 2   | 2      | 1      | 5336.2165        | 0.0042                              |
| 4  | 2     | 2     | 3   | 1      | 2      | 5964.0293        | -0.0003                             |
| 4  | 1     | 3     | 3   | 0      | 3      | 6119.9328        | 0.0039                              |
| 4  | 2     | 3     | 3   | 1      | 3      | 6338.4500        | 0.0011                              |
| 4  | 3     | 1     | 3   | 2      | 1      | 6382.7769        | 0.0056                              |
| 4  | 3     | 2     | 3   | 2      | 2      | 6614.8154        | 0.0000                              |
| 4  | 4     | 0     | 3   | 3      | 0      | 7173.5053        | -0.0071                             |
| 4  | 4     | 1     | 3   | 3      | 1      | 7196.3145        | -0.0046                             |
| 5  | 2     | 3     | 4   | 1      | 3      | 7474.1683        | 0.0025                              |
| 5  | 3     | 2     | 4   | 2      | 2      | 7574.8089        | -0.0043                             |
| 5  | 1     | 4     | 4   | 0      | 4      | 7767.3184        | -0.0024                             |
| 5  | 3     | 3     | 4   | 2      | 3      | 7977.7700        | -0.0099                             |

**Table S21.** Benchmarking of the theoretical rotational constants against the experimental ( $A_{\text{calc}} - A_{\text{exp}})/A_{\text{exp}} \times 100\%$ ).

|     |   | Exp.     | B3LYP | % error | MP2    | % error |
|-----|---|----------|-------|---------|--------|---------|
| I   | A | 865.6533 | 872.3 | 0.8%    | 888.5  | 2.6%    |
|     | B | 700.4774 | 691.1 | -1.3%   | 693.2  | -1.0%   |
|     | C | 449.1701 | 447.0 | -0.5%   | 453.0  | 0.9%    |
| II  | A | 894.3034 | 896.1 | 0.2%    | 918.6  | 2.7%    |
|     | B | 677.7762 | 693.2 | 2.3%    | 697.0  | 2.8%    |
|     | C | 451.3106 | 450.7 | -0.1%   | 459.1  | 1.7%    |
| III | A | 966.1056 | 967.3 | 0.1%    | 979.6  | 1.4%    |
|     | B | 638.5465 | 632.2 | -1.0%   | 641.2  | 0.4%    |
|     | C | 453.9216 | 450.4 | -0.8%   | 459.4  | 1.2%    |
| IV  | A | 868.6112 | 858.0 | -1.2%   | 880.8  | 1.4%    |
|     | B | 739.8331 | 740.9 | 0.1%    | 741.3  | 0.2%    |
|     | C | 463.7072 | 461.2 | -0.5%   | 468.1  | 0.9%    |
| V   | A | 987.5630 | 988.5 | 0.1%    | 1002.0 | 1.5%    |
|     | B | 634.2307 | 630.1 | -0.7%   | 635.2  | 0.2%    |
|     | C | 447.6706 | 445.6 | -0.5%   | 451.7  | 0.9%    |
| VI  | A | 915.2201 | 914.3 | -0.1%   | 925.0  | 1.1%    |
|     | B | 677.8858 | 673.7 | -0.6%   | 680.3  | 0.4%    |
|     | C | 444.2806 | 442.3 | -0.4%   | 447.9  | 0.8%    |
| VII | A | 942.6801 | 943.7 | 0.1%    | 951.8  | 1.0%    |
|     | B | 684.6639 | 682.2 | -0.4%   | 687.6  | 0.4%    |
|     | C | 454.1837 | 453.3 | -0.2%   | 458.3  | 0.9%    |

**Table S22.** Experimental spectroscopic parameters for all singly substituted  $^{13}\text{C}$  isotopic species of conformer **I** of cyclododecanone.

| Parameter        | $^{13}\text{C1}$           | $^{13}\text{C2}$ | $^{13}\text{C3}$ | $^{13}\text{C4}$ | $^{13}\text{C5}$ | $^{13}\text{C6}$ |
|------------------|----------------------------|------------------|------------------|------------------|------------------|------------------|
| $A^a$ (MHz)      | 864.87370(50) <sup>d</sup> | 861.13503(64)    | 859.18593(64)    | 858.93471(64)    | 859.15910(84)    | 863.74937(65)    |
| $B$ (MHz)        | 694.12935(43)              | 695.25709(57)    | 699.31745(54)    | 700.26558(56)    | 697.84486(66)    | 695.85541(54)    |
| $C$ (MHz)        | 446.6440(38)               | 445.8214(48)     | 447.2179(50)     | 447.4311(58)     | 446.3518(71)     | 447.2838(47)     |
| $\sigma^b$ (kHz) | 4.6                        | 5.8              | 5.3              | 5.8              | 6.2              | 5.8              |
| $N^c$            | 12                         | 13               | 14               | 13               | 11               | 14               |

| Parameter      | $^{13}\text{C7}$ | $^{13}\text{C8}$ | $^{13}\text{C9}$ | $^{13}\text{C10}$ | $^{13}\text{C11}$ | $^{13}\text{C12}$ |
|----------------|------------------|------------------|------------------|-------------------|-------------------|-------------------|
| $A$ (MHz)      | 865.45973(57)    | 864.63984(57)    | 859.48402(70)    | 859.11877(80)     | 858.85381(60)     | 860.93795(55)     |
| $B$ (MHz)      | 696.17817(47)    | 694.31823(47)    | 696.61313(72)    | 700.06292(55)     | 699.71525(54)     | 696.70868(47)     |
| $C$ (MHz)      | 447.3455(44)     | 446.4771(41)     | 445.9561(64)     | 447.4101(55)      | 447.5108(52)      | 446.5277(42)      |
| $\sigma$ (kHz) | 4.5              | 5.1              | 6.1              | 4.5               | 5.4               | 5.1               |
| $N$            | 11               | 12               | 13               | 10                | 13                | 15                |

[a]  $A$ ,  $B$  and  $C$  are the rotational constants.  $\Delta_J$ ,  $\Delta_{JK}$ ,  $\Delta_K$ ,  $\delta_J$  and  $\delta_K$  centrifugal distortion constants were fixed to parent species values. [b]  $\sigma$  is the rms deviation of the fit. [c]  $N$  is the number of the fitted transitions. [d] Standard error in parentheses in units of the last digit.

**Table S23.** Substitution coordinates of the heavy atoms of conformer **I** of cyclododecanone in Å.

|                 | <i>a</i>                | <i>b</i>    | <i>c</i>               |
|-----------------|-------------------------|-------------|------------------------|
| $\text{C}_1$    | 2.4947(14) <sup>a</sup> | -0.3931(91) | 0.6193(57)             |
| $\text{C}_2$    | 2.3021(17)              | -1.7832(23) | -0.100(40)             |
| $\text{C}_3$    | 0.9169(37)              | -2.0230(17) | -0.5807(60)            |
| $\text{C}_4$    | -0.144(24)              | -2.0919(17) | 0.4476(81)             |
| $\text{C}_5$    | -1.6219(29)             | -2.1208(23) | -0.105(46)             |
| $\text{C}_6$    | -2.0287(16)             | -0.8018(41) | -0.8186(40)            |
| $\text{C}_7$    | -2.1138(15)             | 0.3760(87)  | 0.000(40) <sup>b</sup> |
| $\text{C}_8$    | 2.4986(13)              | 0.7512(44)  | -0.3839(84)            |
| $\text{C}_9$    | 1.9629(22)              | 2.0689(22)  | 0.198(23)              |
| $\text{C}_{10}$ | 0.4537(93)              | 2.0585(21)  | 0.4678(94)             |
| $\text{C}_{11}$ | -0.4142(85)             | 2.0047(18)  | -0.7860(47)            |
| $\text{C}_{12}$ | -1.9010(18)             | 1.7509(20)  | -0.4690(75)            |

[a] The errors include Costain's error. [b] Imaginary coordinate set to zero.

**Table S24.** The Cartesian coordinates of the conformer I of cyclododecanone from B3LYP-D3BJ/3-611++G(d,p).

| Centre number | Atomic Number | Coordinates (Å) |           |           |
|---------------|---------------|-----------------|-----------|-----------|
|               |               | X               | Y         | Z         |
| 1             | 6             | -2.477102       | 0.473776  | 0.595390  |
| 2             | 6             | -2.219709       | 1.839251  | -0.060884 |
| 3             | 6             | -0.794690       | 2.011193  | -0.611634 |
| 4             | 6             | 0.287131        | 2.077147  | 0.472622  |
| 5             | 6             | 1.726226        | 2.073248  | -0.062762 |
| 6             | 6             | 2.128470        | 0.764810  | -0.752025 |
| 7             | 6             | 2.168120        | -0.443034 | 0.177685  |
| 8             | 8             | 2.402531        | -0.323466 | 1.362264  |
| 9             | 6             | -2.497041       | -0.703266 | -0.398968 |
| 10            | 6             | -1.985902       | -2.028011 | 0.188259  |
| 11            | 6             | -0.479885       | -2.039958 | 0.493215  |
| 12            | 6             | 0.401886        | -1.997401 | -0.759588 |
| 13            | 6             | 1.901081        | -1.799833 | -0.449957 |
| 14            | 1             | -1.718883       | 0.301438  | 1.364077  |
| 15            | 1             | -3.431469       | 0.504772  | 1.130925  |
| 16            | 1             | -2.939769       | 1.985736  | -0.874717 |
| 17            | 1             | -2.416071       | 2.633876  | 0.668397  |
| 18            | 1             | -3.518420       | -0.842823 | -0.767687 |
| 19            | 1             | -1.903505       | -0.452524 | -1.282980 |
| 20            | 1             | -0.578278       | 1.192805  | -1.305443 |
| 21            | 1             | -0.749862       | 2.926956  | -1.212547 |
| 22            | 1             | -2.537131       | -2.246231 | 1.110186  |
| 23            | 1             | -2.216452       | -2.845170 | -0.505781 |
| 24            | 1             | 0.134209        | 2.985729  | 1.065742  |
| 25            | 1             | 0.178419        | 1.244597  | 1.172236  |
| 26            | 1             | -0.228136       | -1.200972 | 1.147737  |
| 27            | 1             | -0.232244       | -2.940115 | 1.066100  |
| 28            | 1             | 2.413604        | 2.248969  | 0.767966  |
| 29            | 1             | 1.860343        | 2.898833  | -0.770594 |
| 30            | 1             | 0.281433        | -2.929636 | -1.321099 |
| 31            | 1             | 0.068881        | -1.198949 | -1.428610 |
| 32            | 1             | 1.491265        | 0.546967  | -1.612707 |
| 33            | 1             | 3.145478        | 0.854421  | -1.157825 |
| 34            | 1             | 2.251953        | -2.568962 | 0.241650  |
| 35            | 1             | 2.472888        | -1.879525 | -1.381256 |

**Table S25.** The Cartesian coordinates of the conformer **II** of cyclododecanone from B3LYP-D3BJ/3-611++G(d,p).

| Centre number | Atomic Number | Coordinates (Å) |           |           |
|---------------|---------------|-----------------|-----------|-----------|
|               |               | X               | Y         | Z         |
| 1             | 6             | -2.587084       | -1.240685 | 0.554532  |
| 2             | 6             | -1.445320       | -2.079573 | -0.054339 |
| 3             | 6             | -0.059429       | -1.528918 | 0.287638  |
| 4             | 6             | 1.129844        | -2.259188 | -0.331021 |
| 5             | 6             | 2.473237        | -1.587799 | -0.005946 |
| 6             | 6             | 2.622214        | -0.169940 | -0.589578 |
| 7             | 6             | 1.826595        | 0.904277  | 0.151584  |
| 8             | 8             | 1.877792        | 0.998261  | 1.359779  |
| 9             | 6             | -3.052415       | -0.026834 | -0.274499 |
| 10            | 6             | -1.983775       | 0.994084  | -0.695713 |
| 11            | 6             | -1.273719       | 1.708702  | 0.461549  |
| 12            | 6             | -0.108106       | 2.613253  | 0.027456  |
| 13            | 6             | 1.030333        | 1.886901  | -0.699222 |
| 14            | 1             | -3.462845       | -1.881357 | 0.700734  |
| 15            | 1             | -2.288818       | -0.916341 | 1.557966  |
| 16            | 1             | -1.567241       | -2.132732 | -1.144209 |
| 17            | 1             | -1.519491       | -3.110710 | 0.309372  |
| 18            | 1             | -3.836039       | 0.491446  | 0.291597  |
| 19            | 1             | -3.536110       | -0.401592 | -1.184621 |
| 20            | 1             | 0.061240        | -1.504413 | 1.376782  |
| 21            | 1             | -0.025564       | -0.490523 | -0.028803 |
| 22            | 1             | -2.460368       | 1.747784  | -1.334390 |
| 23            | 1             | -1.256132       | 0.489087  | -1.338277 |
| 24            | 1             | 1.004399        | -2.310153 | -1.420786 |
| 25            | 1             | 1.154707        | -3.296076 | 0.023448  |
| 26            | 1             | -2.006748       | 2.322409  | 0.997326  |
| 27            | 1             | -0.903981       | 0.984796  | 1.190335  |
| 28            | 1             | 3.287562        | -2.205938 | -0.395427 |
| 29            | 1             | 2.609053        | -1.529832 | 1.078315  |
| 30            | 1             | -0.486668       | 3.400207  | -0.634543 |
| 31            | 1             | 0.301836        | 3.109624  | 0.910426  |
| 32            | 1             | 2.365513        | -0.167212 | -1.653149 |
| 33            | 1             | 3.672307        | 0.136463  | -0.514464 |
| 34            | 1             | 1.764546        | 2.618933  | -1.064751 |
| 35            | 1             | 0.672247        | 1.374363  | -1.595769 |

**Table S26.** The Cartesian coordinates of the conformer **III** of cyclododecanone from B3LYP-D3BJ/3-611++G(d,p).

| Centre number | Atomic Number | Coordinates (Å) |           |           |
|---------------|---------------|-----------------|-----------|-----------|
|               |               | X               | Y         | Z         |
| 1             | 6             | -2.958544       | 0.942665  | -0.085280 |
| 2             | 6             | -2.731305       | -0.476782 | -0.639921 |
| 3             | 6             | -2.243016       | -1.537281 | 0.367658  |
| 4             | 6             | -0.729601       | -1.601147 | 0.641178  |
| 5             | 6             | 0.110509        | -2.003086 | -0.575370 |
| 6             | 6             | 1.627361        | -2.021345 | -0.292711 |
| 7             | 6             | 2.171303        | -0.667481 | 0.135117  |
| 8             | 8             | 2.560090        | -0.470258 | 1.267663  |
| 9             | 6             | -1.749175       | 1.625785  | 0.569088  |
| 10            | 6             | -0.520726       | 1.739300  | -0.340137 |
| 11            | 6             | 0.765608        | 2.070325  | 0.423767  |
| 12            | 6             | 2.060548        | 1.853230  | -0.373506 |
| 13            | 6             | 2.229760        | 0.428271  | -0.922901 |
| 14            | 1             | -3.324636       | 1.571478  | -0.906119 |
| 15            | 1             | -3.771601       | 0.901201  | 0.649314  |
| 16            | 1             | -2.053138       | -0.436599 | -1.497783 |
| 17            | 1             | -3.688627       | -0.815743 | -1.049530 |
| 18            | 1             | -2.046855       | 2.622928  | 0.912553  |
| 19            | 1             | -1.472469       | 1.074836  | 1.474055  |
| 20            | 1             | -2.557731       | -2.524304 | 0.008225  |
| 21            | 1             | -2.766143       | -1.386179 | 1.319297  |
| 22            | 1             | -0.389737       | 0.791890  | -0.864377 |
| 23            | 1             | -0.701275       | 2.486539  | -1.122760 |
| 24            | 1             | -0.551445       | -2.330321 | 1.439645  |
| 25            | 1             | -0.371807       | -0.648637 | 1.034440  |
| 26            | 1             | 0.732183        | 3.108599  | 0.771417  |
| 27            | 1             | 0.812300        | 1.453409  | 1.325929  |
| 28            | 1             | -0.092146       | -1.332983 | -1.415553 |
| 29            | 1             | -0.188666       | -3.001901 | -0.910930 |
| 30            | 1             | 2.910383        | 2.083443  | 0.273533  |
| 31            | 1             | 2.104630        | 2.550873  | -1.217310 |
| 32            | 1             | 1.857146        | -2.733904 | 0.502530  |
| 33            | 1             | 2.154701        | -2.336103 | -1.201094 |
| 34            | 1             | 1.509741        | 0.216392  | -1.716480 |
| 35            | 1             | 3.218146        | 0.332425  | -1.392201 |

**Table S27.** The Cartesian coordinates of the conformer **IV** of cyclododecanone from B3LYP-D3BJ/3-611++G(d,p).

| Centre number | Atomic Number | Coordinates (Å) |           |           |
|---------------|---------------|-----------------|-----------|-----------|
|               |               | X               | Y         | Z         |
| 1             | 6             | -2.544407       | -0.838240 | -0.250545 |
| 2             | 6             | -2.578043       | 0.535522  | 0.458518  |
| 3             | 6             | -2.203144       | 1.713154  | -0.454332 |
| 4             | 6             | -0.712145       | 1.737881  | -0.823428 |
| 5             | 6             | 0.186338        | 2.247629  | 0.311070  |
| 6             | 6             | 1.697394        | 2.022561  | 0.077596  |
| 7             | 6             | 2.077791        | 0.569532  | 0.322062  |
| 8             | 8             | 2.280773        | 0.168712  | 1.449422  |
| 9             | 6             | -1.861340       | -1.943429 | 0.570185  |
| 10            | 6             | -0.338237       | -1.770855 | 0.674305  |
| 11            | 6             | 0.408152        | -2.171904 | -0.605275 |
| 12            | 6             | 1.907252        | -1.830608 | -0.626768 |
| 13            | 6             | 2.210219        | -0.349014 | -0.883988 |
| 14            | 1             | -3.566512       | -1.144057 | -0.493802 |
| 15            | 1             | -2.032242       | -0.744444 | -1.214032 |
| 16            | 1             | -1.901387       | 0.522675  | 1.318855  |
| 17            | 1             | -3.575621       | 0.704137  | 0.874978  |
| 18            | 1             | -2.297168       | -1.955855 | 1.575757  |
| 19            | 1             | -2.084626       | -2.922069 | 0.128859  |
| 20            | 1             | -2.804475       | 1.658491  | -1.368902 |
| 21            | 1             | -2.469246       | 2.659722  | 0.030657  |
| 22            | 1             | 0.049648        | -2.371912 | 1.502976  |
| 23            | 1             | -0.112277       | -0.737262 | 0.942148  |
| 24            | 1             | -0.555790       | 2.371159  | -1.703830 |
| 25            | 1             | -0.408824       | 0.731296  | -1.122279 |
| 26            | 1             | -0.068083       | -1.712698 | -1.480253 |
| 27            | 1             | 0.292939        | -3.253468 | -0.740168 |
| 28            | 1             | 0.009717        | 3.319699  | 0.444194  |
| 29            | 1             | -0.082283       | 1.774371  | 1.260001  |
| 30            | 1             | 2.385576        | -2.415340 | -1.418278 |
| 31            | 1             | 2.375319        | -2.129438 | 0.315524  |
| 32            | 1             | 1.969439        | 2.331489  | -0.937017 |
| 33            | 1             | 2.264530        | 2.626144  | 0.789566  |
| 34            | 1             | 1.610287        | 0.036853  | -1.713245 |
| 35            | 1             | 3.255915        | -0.232564 | -1.203481 |

**Table S28.** The Cartesian coordinates of the conformer **V** of cyclododecanone from B3LYP-D3BJ/3-611++G(d,p).

| Centre number | Atomic Number | Coordinates (Å) |           |           |
|---------------|---------------|-----------------|-----------|-----------|
|               |               | X               | Y         | Z         |
| 1             | 6             | -0.971000       | 2.187479  | 0.408262  |
| 2             | 6             | 0.251783        | 1.686067  | -0.365795 |
| 3             | 6             | 1.553405        | 1.778349  | 0.436002  |
| 4             | 6             | 2.772847        | 1.124924  | -0.238937 |
| 5             | 6             | 2.947648        | -0.389223 | -0.024063 |
| 6             | 6             | 1.900767        | -1.297501 | -0.681711 |
| 7             | 6             | 0.645749        | -1.561346 | 0.145220  |
| 8             | 8             | 0.631639        | -1.415423 | 1.348978  |
| 9             | 6             | -2.323648       | 1.864777  | -0.252270 |
| 10            | 6             | -2.509212       | 0.384954  | -0.632310 |
| 11            | 6             | -2.308794       | -0.593500 | 0.536725  |
| 12            | 6             | -1.898244       | -2.016516 | 0.128382  |
| 13            | 6             | -0.560842       | -2.094360 | -0.618307 |
| 14            | 1             | -0.945272       | 1.755440  | 1.413658  |
| 15            | 1             | -0.893687       | 3.271289  | 0.551133  |
| 16            | 1             | 0.355714        | 2.244547  | -1.304982 |
| 17            | 1             | 0.085227        | 0.650089  | -0.659744 |
| 18            | 1             | -3.125623       | 2.171434  | 0.429267  |
| 19            | 1             | -2.442104       | 2.473257  | -1.156551 |
| 20            | 1             | 1.772170        | 2.835822  | 0.623122  |
| 21            | 1             | 1.401584        | 1.317185  | 1.417947  |
| 22            | 1             | -1.812707       | 0.148912  | -1.441584 |
| 23            | 1             | -3.508006       | 0.247237  | -1.060773 |
| 24            | 1             | 3.679150        | 1.605301  | 0.144421  |
| 25            | 1             | 2.753396        | 1.340334  | -1.315634 |
| 26            | 1             | -3.231889       | -0.646857 | 1.123753  |
| 27            | 1             | -1.545691       | -0.217088 | 1.217536  |
| 28            | 1             | 2.965129        | -0.604469 | 1.048320  |
| 29            | 1             | 3.930692        | -0.668080 | -0.415910 |
| 30            | 1             | -2.670111       | -2.465202 | -0.507293 |
| 31            | 1             | -1.833648       | -2.631815 | 1.029651  |
| 32            | 1             | 2.333478        | -2.292402 | -0.857839 |
| 33            | 1             | 1.616773        | -0.926598 | -1.671593 |
| 34            | 1             | -0.611986       | -1.588667 | -1.586931 |
| 35            | 1             | -0.328456       | -3.140899 | -0.858976 |

**Table S29.** The Cartesian coordinates of the conformer **VI** of cyclododecanone from B3LYP-D3BJ/3-611++G(d,p).

| Centre number | Atomic Number | Coordinates (Å) |           |           |
|---------------|---------------|-----------------|-----------|-----------|
|               |               | X               | Y         | Z         |
| 1             | 6             | 0.466745        | 2.228247  | 0.457782  |
| 2             | 6             | -0.515762       | 1.888649  | -0.668861 |
| 3             | 6             | -1.985482       | 1.822942  | -0.220327 |
| 4             | 6             | -2.355594       | 0.646619  | 0.704381  |
| 5             | 6             | -2.741442       | -0.670594 | 0.008935  |
| 6             | 6             | -1.643661       | -1.346379 | -0.819363 |
| 7             | 6             | -0.425190       | -1.777865 | -0.014091 |
| 8             | 8             | -0.491588       | -1.964882 | 1.182774  |
| 9             | 6             | 1.947664        | 2.134183  | 0.052498  |
| 10            | 6             | 2.390976        | 0.744975  | -0.435447 |
| 11            | 6             | 2.250314        | -0.360801 | 0.622575  |
| 12            | 6             | 2.138667        | -1.783421 | 0.054929  |
| 13            | 6             | 0.871428        | -2.011926 | -0.781281 |
| 14            | 1             | 0.261007        | 3.245138  | 0.811452  |
| 15            | 1             | 0.283265        | 1.575481  | 1.315713  |
| 16            | 1             | -0.231337       | 0.941028  | -1.128568 |
| 17            | 1             | -0.416803       | 2.641904  | -1.459845 |
| 18            | 1             | 2.149513        | 2.866759  | -0.738067 |
| 19            | 1             | 2.565712        | 2.429589  | 0.908547  |
| 20            | 1             | -2.632146       | 1.796870  | -1.106109 |
| 21            | 1             | -2.223206       | 2.761779  | 0.293250  |
| 22            | 1             | 3.433076        | 0.797385  | -0.769086 |
| 23            | 1             | 1.813791        | 0.486825  | -1.327823 |
| 24            | 1             | -3.215006       | 0.944966  | 1.313383  |
| 25            | 1             | -1.547817       | 0.451515  | 1.413680  |
| 26            | 1             | 3.106363        | -0.314659 | 1.304003  |
| 27            | 1             | 1.370579        | -0.179910 | 1.242393  |
| 28            | 1             | -3.600603       | -0.490022 | -0.646994 |
| 29            | 1             | -3.073555       | -1.374930 | 0.776147  |
| 30            | 1             | 2.142213        | -2.494901 | 0.884041  |
| 31            | 1             | 3.011135        | -2.011920 | -0.567341 |
| 32            | 1             | -1.326002       | -0.721433 | -1.656831 |
| 33            | 1             | -2.040686       | -2.262989 | -1.278456 |
| 34            | 1             | 0.838266        | -3.053868 | -1.126985 |
| 35            | 1             | 0.872976        | -1.403320 | -1.689080 |



**Table S30.** The Cartesian coordinates of the conformer **VII** of cyclododecanone from B3LYP-D3BJ/3-611++G(d,p).

| Centre number | Atomic Number | Coordinates (Å) |           |           |
|---------------|---------------|-----------------|-----------|-----------|
|               |               | X               | Y         | Z         |
| 1             | 6             | 2.544409        | -0.838239 | -0.250543 |
| 2             | 6             | 2.578039        | 0.535524  | 0.458520  |
| 3             | 6             | 2.203144        | 1.713154  | -0.454333 |
| 4             | 6             | 0.712144        | 1.737883  | -0.823430 |
| 5             | 6             | -0.186338       | 2.247627  | 0.311070  |
| 6             | 6             | -1.697394       | 2.022559  | 0.077599  |
| 7             | 6             | -2.077792       | 0.569531  | 0.322062  |
| 8             | 8             | -2.280777       | 0.168710  | 1.449421  |
| 9             | 6             | 1.861341        | -1.943429 | 0.570185  |
| 10            | 6             | 0.338238        | -1.770855 | 0.674304  |
| 11            | 6             | -0.408150       | -2.171903 | -0.605276 |
| 12            | 6             | -1.907250       | -1.830608 | -0.626771 |
| 13            | 6             | -2.210218       | -0.349014 | -0.883989 |
| 14            | 1             | 2.032249        | -0.744445 | -1.214033 |
| 15            | 1             | 3.566517        | -1.144054 | -0.493795 |
| 16            | 1             | 3.575615        | 0.704140  | 0.874984  |
| 17            | 1             | 1.901379        | 0.522677  | 1.318853  |
| 18            | 1             | 2.297168        | -1.955855 | 1.575757  |
| 19            | 1             | 2.084627        | -2.922069 | 0.128859  |
| 20            | 1             | 2.804476        | 1.658490  | -1.368902 |
| 21            | 1             | 2.469245        | 2.659722  | 0.030656  |
| 22            | 1             | -0.049647       | -2.371913 | 1.502975  |
| 23            | 1             | 0.112279        | -0.737262 | 0.942149  |
| 24            | 1             | 0.555790        | 2.371164  | -1.703831 |
| 25            | 1             | 0.408823        | 0.731299  | -1.122284 |
| 26            | 1             | -0.292937       | -3.253467 | -0.740170 |
| 27            | 1             | 0.068084        | -1.712696 | -1.480254 |
| 28            | 1             | 0.082285        | 1.774366  | 1.260000  |
| 29            | 1             | -0.009718       | 3.319697  | 0.444197  |
| 30            | 1             | -2.375319       | -2.129441 | 0.315521  |
| 31            | 1             | -2.385573       | -2.415338 | -1.418282 |
| 32            | 1             | -2.264528       | 2.626142  | 0.789570  |
| 33            | 1             | -1.969440       | 2.331489  | -0.937013 |
| 34            | 1             | -1.610285       | 0.036855  | -1.713244 |
| 35            | 1             | -3.255914       | -0.232564 | -1.203483 |
